# Supplementary material
Source: PubMed Central journal article supplement (PMC143493)
Supplement: plntcell_15_1_223__2.pdf [file plntcell_15_1_223__2.pdf]

**Supplemental Figure 1.** Correlation between levels of *TOCI* mRNA and circadian phenotypes in different *TOCI* RNAi lines.

(A) *TOCI* mRNA levels of expression in WT and in *TOCI* RNAi lines. Plants were maintained in 12h:12h LD cycles for 12 days before collecting the samples at ZT 7 and 11. Total RNA was extracted, blotted and hybridized as described (Alabadí et al., 2001; Somers et al., 2000). rRNA levels served as loading control.

(B) Analysis of mRNA levels of the different members of the *TOCI* family in WT and *TOCI* RNAi (line 65) plants. The plants were maintained in 12h:12h LD cycles for 6 days before samples were harvested every 4 hours during one LD cycle. RNA was extracted and subjected to reverse transcription reaction (see Methods for details). 2  $\mu$ l of the cDNAs from each time point were combined in one tube and used for PCR amplification using specific primers for each member of the *TOCI* family as previously described (Makino et al., 2002). Samples were blotted and hybridized as previously described (Alabadí et al 2001; Somers et al.2000). Ubiquitin (UBQ) levels were used as control. T-R65: *TOCI* RNAi line 65.

(C and D) Period estimates for individual WT and *TOCI* RNAi bioluminescence traces of *CCR2::luc* expression at 20  $\mu\text{mol m}^{-2} \text{s}^{-1}$  of red (C) and blue (D) light. Period estimates were analyzed by the FFT-NLLS best fit algorithm as described (Millar et al., 1995b; Plautz et al., 1997). Relative amplitude error values above 0.7 represent very altered circadian rhythms (Dowson-Day and Millar, 1999).

(E-H) Bioluminescence analysis of *CCR2::luc* expression in WT and several *TOCI* RNAi plants that were grown in 12h:12h LD cycles for 6 days before being transferred to DD. Traces represent averages of 10-20 seedlings per line.

**Supplemental Figure 2.** Effects of monochromatic red light (RL) on circadian gene expression in WT, *TOC1* RNAi and *toc1-2* plants.

Bioluminescence analysis of *CCR2::luc* (A, C, and E) and *CAB2::luc* (B, D, and F) expression at  $1 \mu\text{mol m}^{-2} \text{s}^{-1}$  (A and B),  $10 \mu\text{mol m}^{-2} \text{s}^{-1}$  (C and D), and  $40 \mu\text{mol m}^{-2} \text{s}^{-1}$  (E and F) of constant RL. Seedlings were grown in 12h:12h LD cycles for 6 days before being transferred to continuous light. Traces represent averages of 10-15 seedlings per line.

**Supplemental Figure 3.** Inhibition of hypocotyl extension under continuous red light ( $25 \mu\text{mol m}^{-2} \text{s}^{-1}$ ) and in the dark.

Seedlings were stratified in the dark at  $4^{\circ}\text{C}$  for 4 days, held in white light ( $50 \mu\text{mol m}^{-2} \text{s}^{-1}$ ) for 6h and maintained in the dark for 18h previous to exposure under red light ( $25 \mu\text{mol m}^{-2} \text{s}^{-1}$ ) for 5 days. As control, seedlings were maintained in constant darkness without light treatment (dark). Col, Columbia; Ws, Wassilewskija.
