# Supplementary material
Source: PubMed Central journal article supplement (PMC143493)

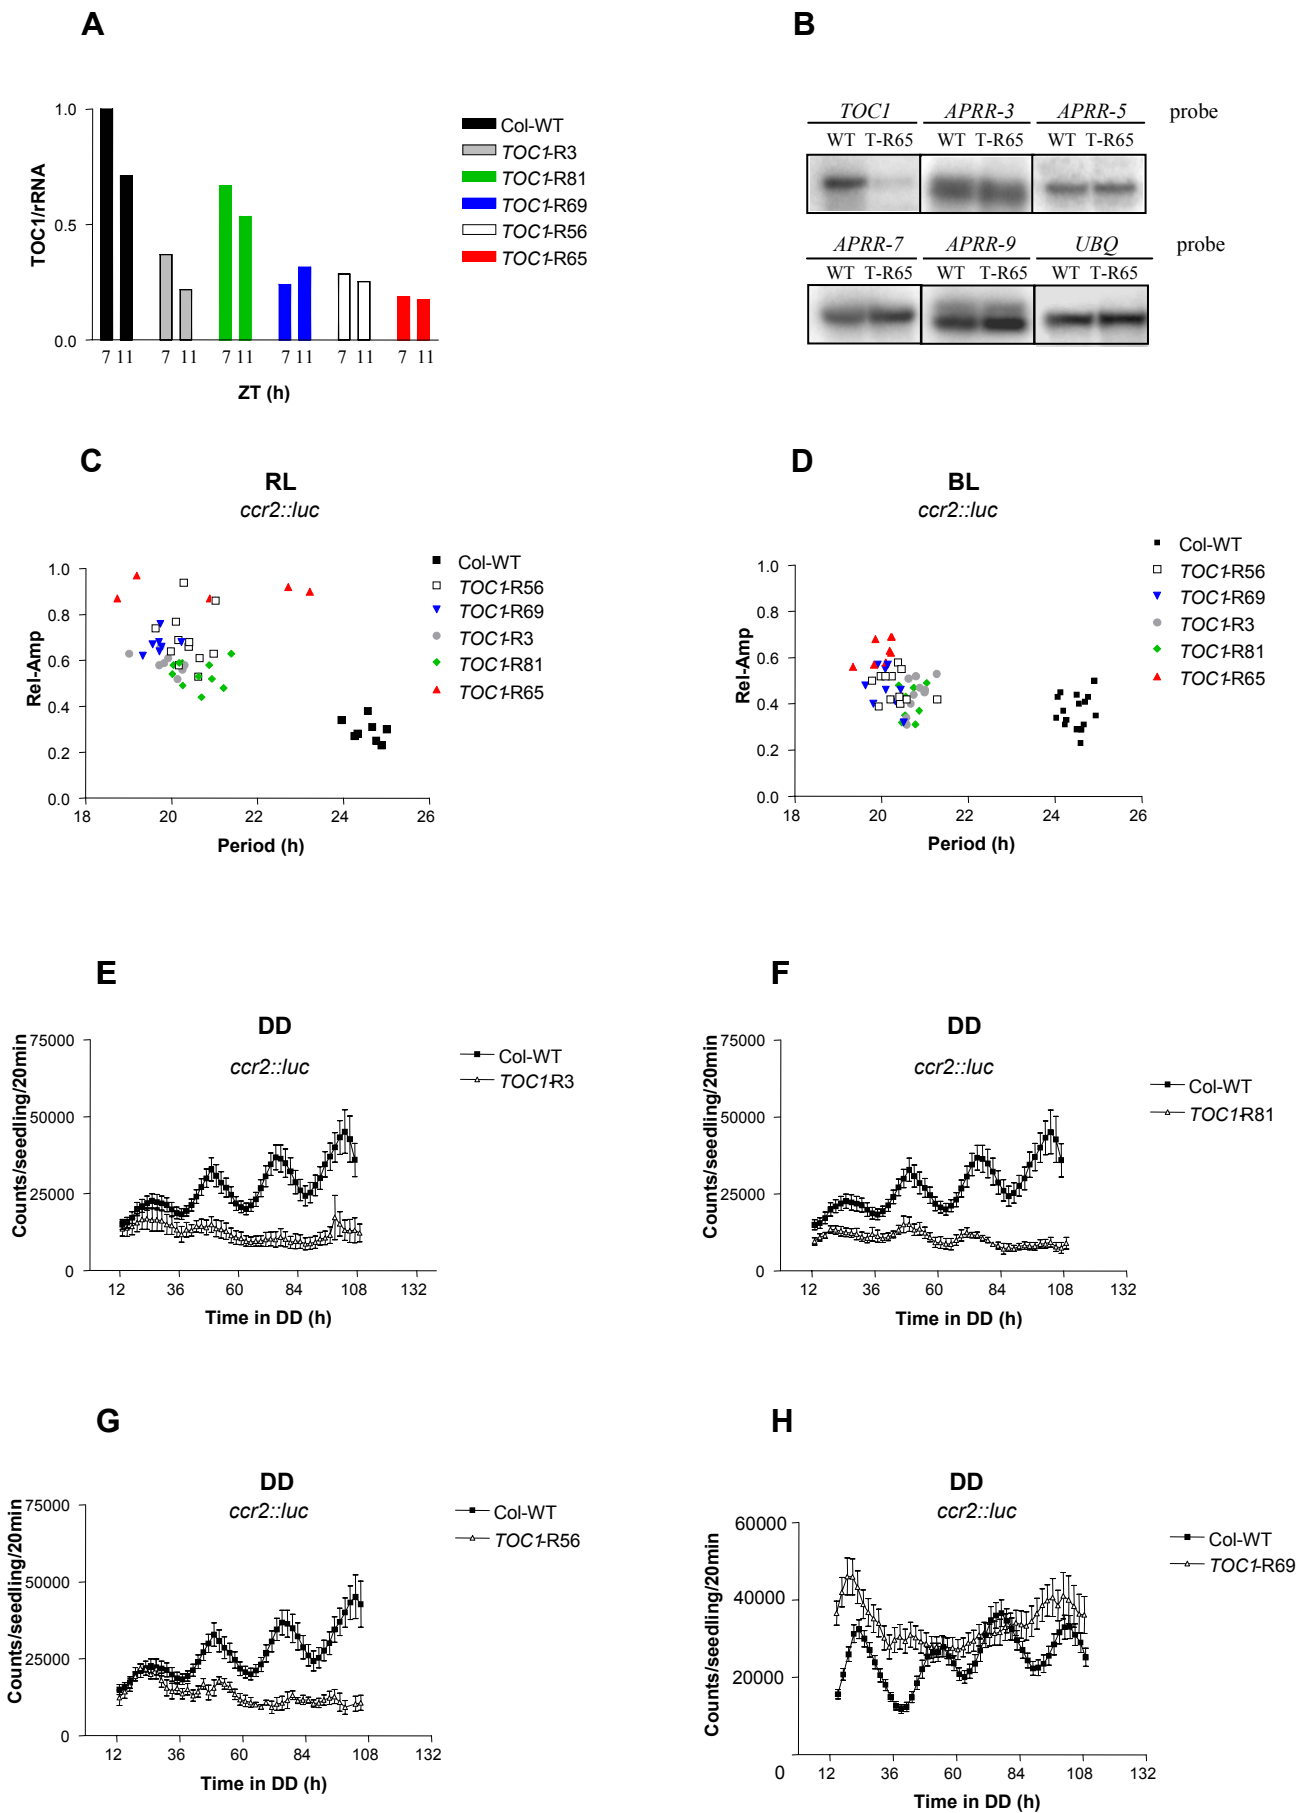

Supplemental Figure 1

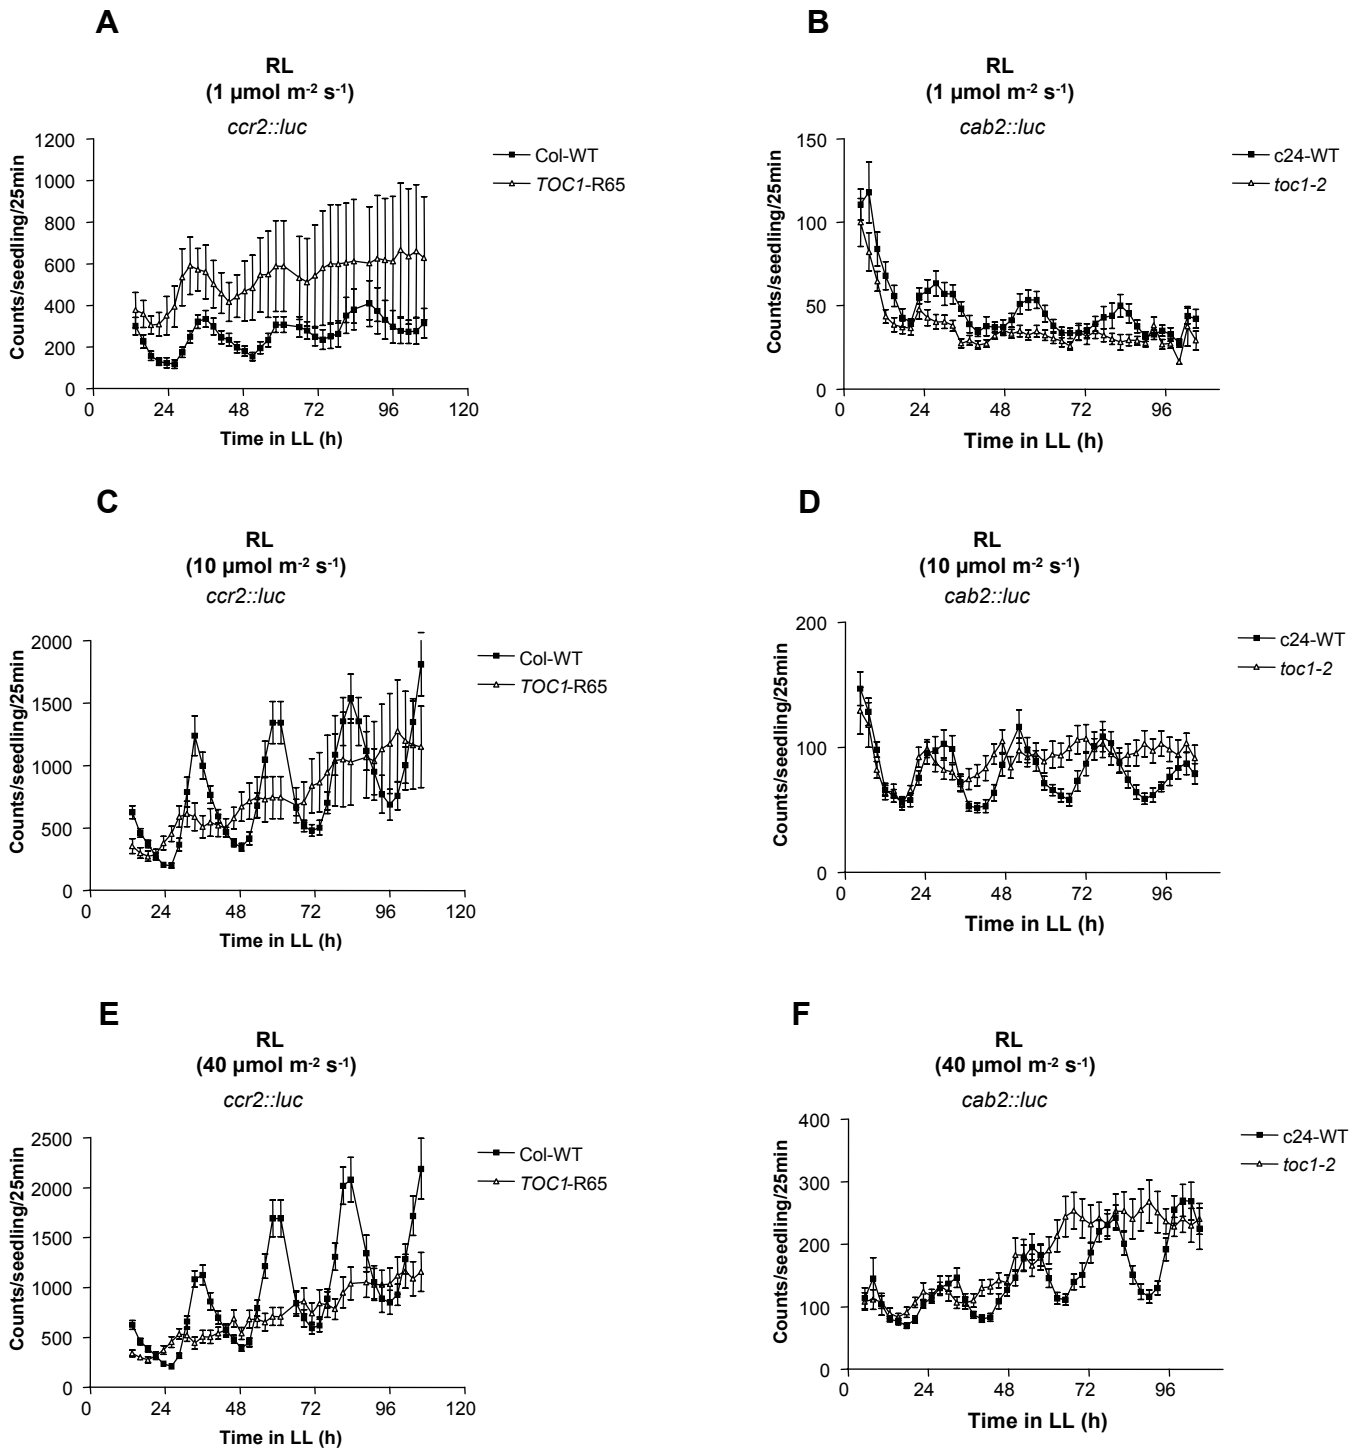

Supplemental Figure 2

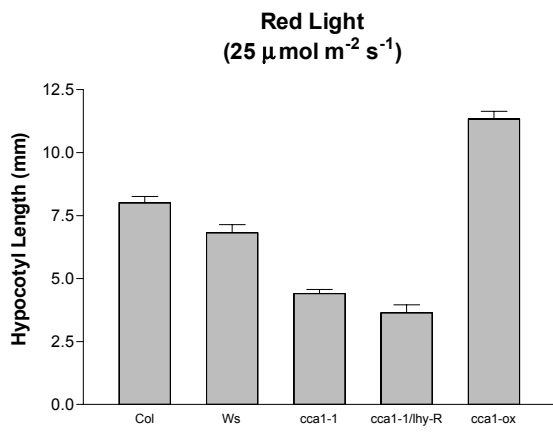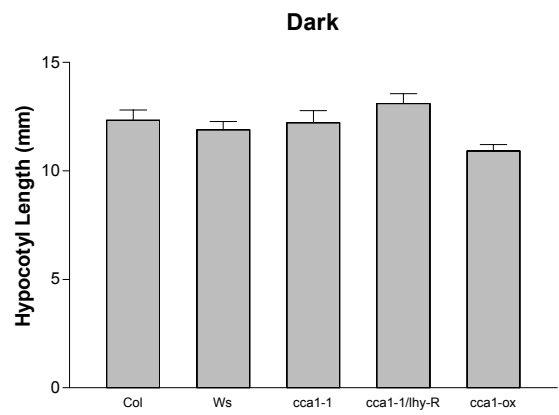

Supplemental Figure 3

Supplement: plntcell_15_1_223__1.pdf [file plntcell_15_1_223__1.pdf]
